# Supplementary material for: Hydrogen Bond Donors Influence on the Electrochemical Performance of Composite Graphene Electrodes/Deep Eutectic Solvents Interface
Source: MDPI journal article supplement (doi:10.3390/electrochem3010009), 2022-02-10
Supplement: s1 [file s1]

## Supporting Information:

### Hydrogen Bond Donors Influence On The Electrochemical Performance Of Composite Carbon Allotrope Electrodes/Deep Eutectic Solvents Interface

Ana T. S. C. Brandão, Renata Costa, A. Fernando Silva and Carlos M. Pereira

**Figure S1** Nitrogen adsorption-desorption isotherms of commercial graphene (a) and commercial graphite obtained at 77.3 K.

**Figure S2:** Electrochemical testing of graphene in R200 electrolyte at 30 °C. a) galvanostatic charge-discharge curves recorded with current density 1, 2 and 4 A.g<sup>-1</sup>. b) CV curves recorded at scan rates 5, 10, 20, 50, 100 and 200 mV. s<sup>-1</sup>, temperature effect at 30, 40, 50 and 60 °C: c) cyclic voltammetry; d) capacitance-potential curve; e) discharge gravimetric capacitance for 1000 cycles; f) capacitance retention.

**Figure S3:** Electrochemical testing of graphene in 1,2-propylene electrolyte at 30 °C. a) galvanostatic charge-discharge curves recorded with current density 1, 2 and 4 A.g<sup>-1</sup>. b) CV curves recorded at scan rates 5, 10, 20, 50, 100 and 200 mV. s<sup>-1</sup>, temperature effect at 30, 40, 50 and 60 °C: c) cyclic voltammetry; d) capacitance-potential curve; e) discharge gravimetric capacitance for 1000 cycles; f) capacitance retention.

**Figure S4:** Electrochemical testing of graphite in R200 electrolyte at 30 °C. a) galvanostatic charge-discharge curves recorded with current density 1, 2 and 4 A.g<sup>-1</sup>. b) CV curves recorded at scan rates 5, 10, 20, 50, 100 and 200 mV. s<sup>-1</sup>, temperature effect at 30, 40, 50 and 60 °C: c) cyclic voltammetry; d) capacitance-potential curve; e) discharge gravimetric capacitance for 1000 cycles; f) capacitance retention.

**Figure S5:** Electrochemical testing of graphite in 1,2-propylene electrolyte at 30 °C. a) galvanostatic charge-discharge curves recorded with current density 1, 2 and 4 A.g<sup>-1</sup>. b) CV curves recorded at scan rates 5, 10, 20, 50, 100 and 200 mV. s<sup>-1</sup>, temperature effect at 30, 40, 50 and 60 °C: c) cyclic voltammetry; d) capacitance-potential curve; e) discharge gravimetric capacitance for 1000 cycles; f) capacitance retention.

**Figure S6:** IR drop for both carbon materials and eutectic mixtures at temperatures between 30 and 60 °C.

**Table S1:** Temperature effect on capacitance (1<sup>st</sup> cycle) for graphene and graphite in both eutectic mixtures.

**Table S2:** Temperature effect on capacitance (1000<sup>th</sup> cycle) for graphene and graphite in both eutectic mixtures.

**Table S3:** Temperature effect on IR drop for graphene and graphite in both eutectic mixtures.

- BET

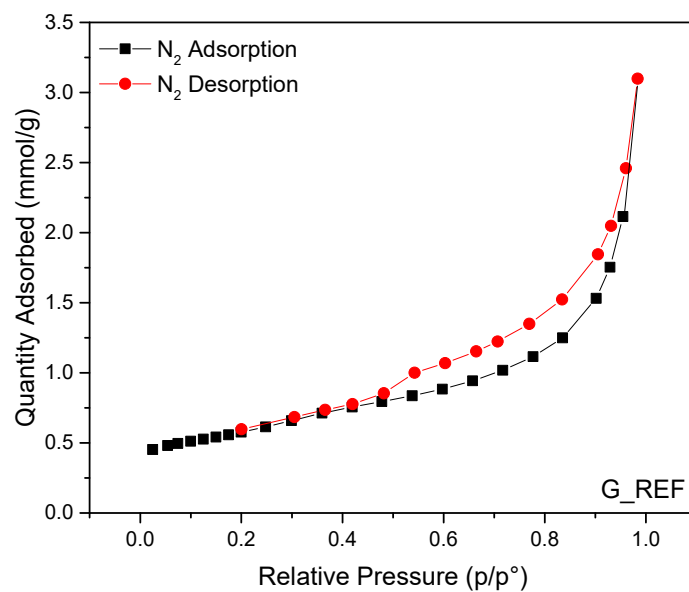

(a)

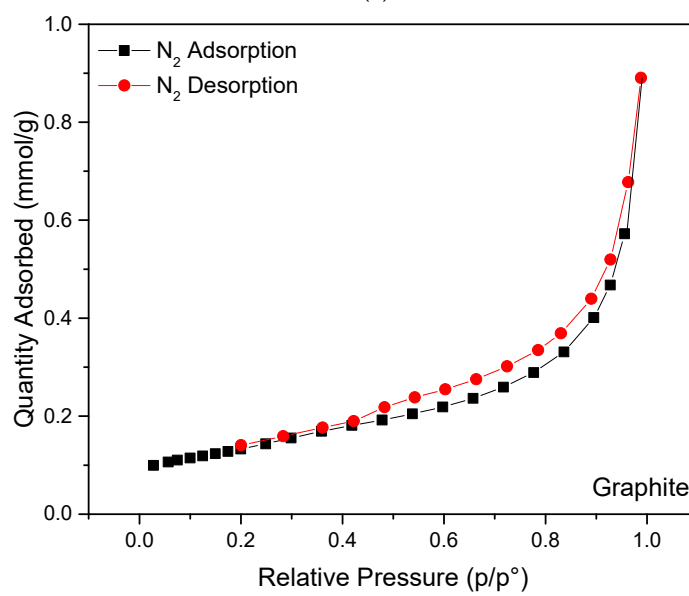

(b)

**Figure S1** Nitrogen adsorption-desorption isotherms of commercial graphene (a) and commercial graphite obtained at 77.3 K.

• Graphene/R200 interface

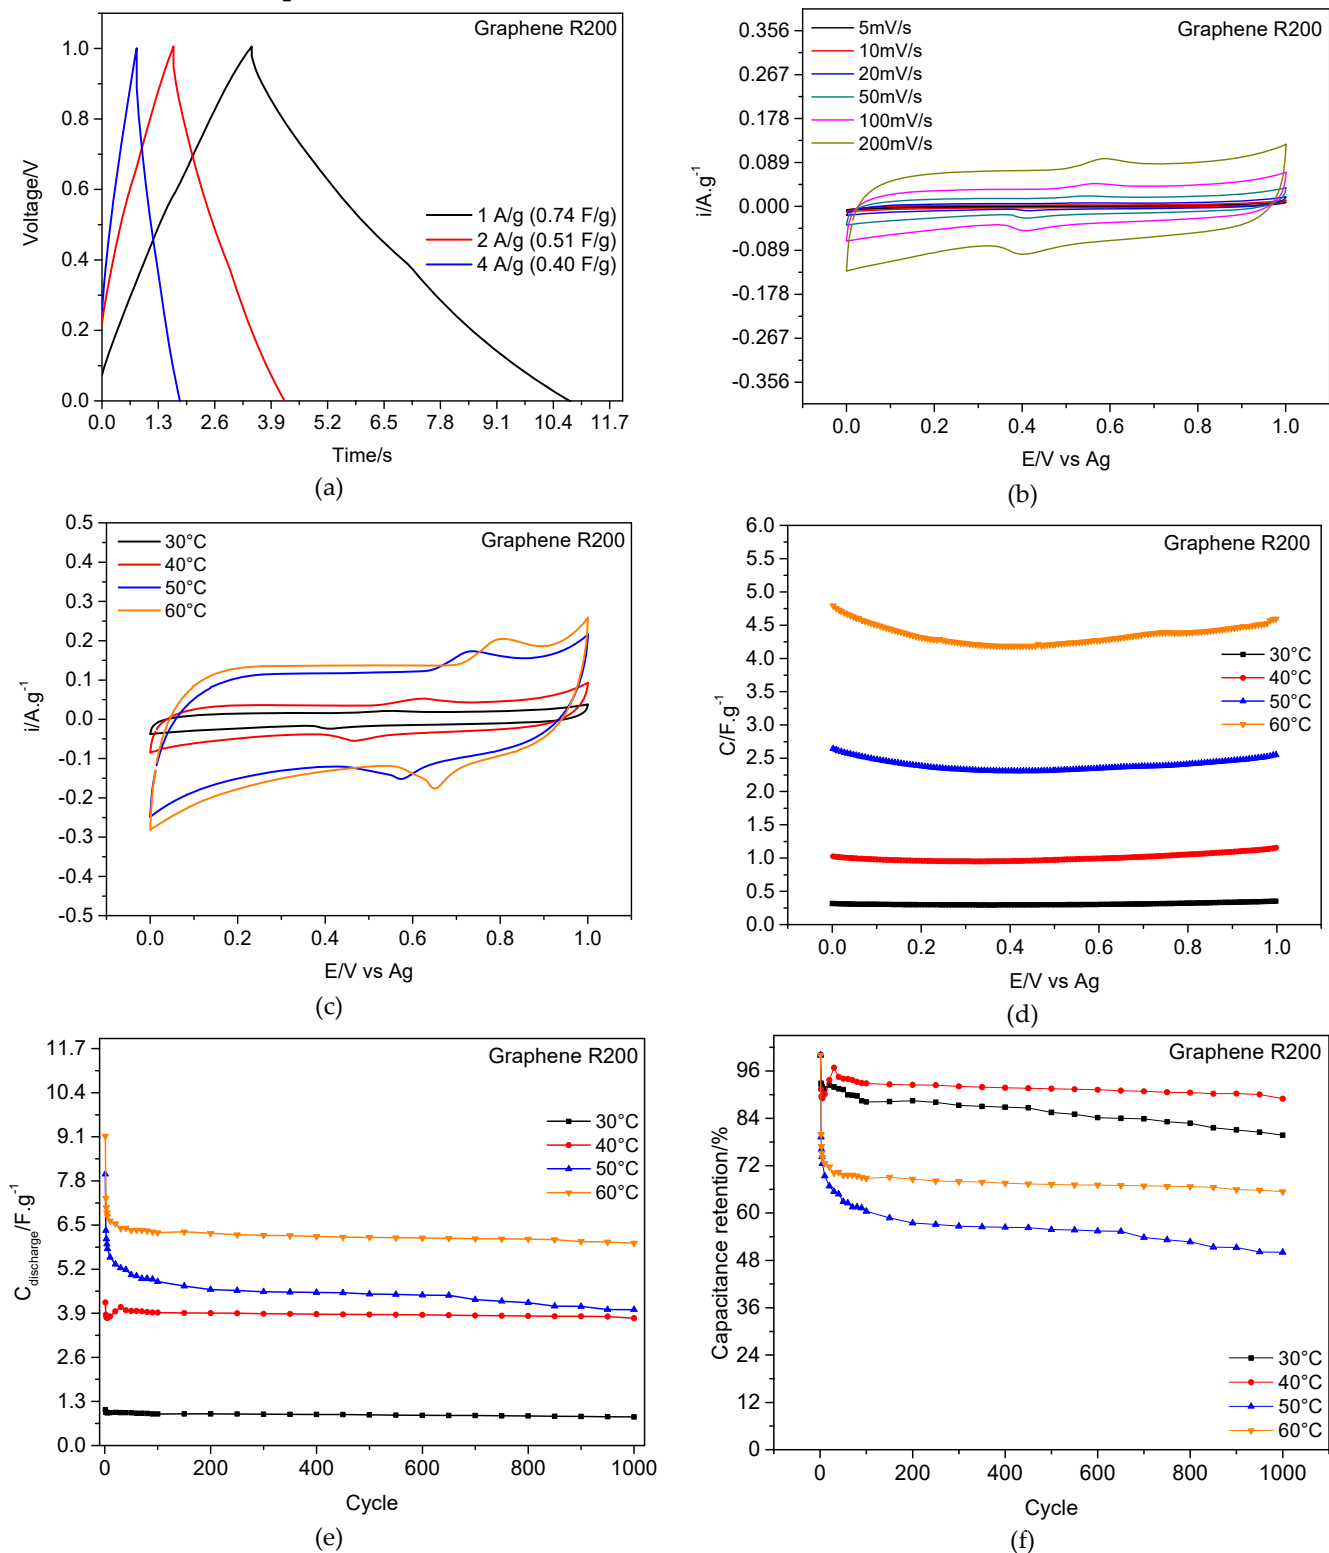

**Figure S2:** Electrochemical testing of graphene in R200 electrolyte at 30 °C. a) galvanostatic charge-discharge curves recorded with current density 1, 2 and 4 A.g<sup>-1</sup>. b) CV curves recorded at scan rates 5, 10, 20, 50, 100 and 200 mV. s<sup>-1</sup>, temperature effect at 30, 40, 50 and 60 °C: c) cyclic voltammetry; d) capacitance-potential curve; e) discharge gravimetric capacitance for 1000 cycles; f) capacitance retention.

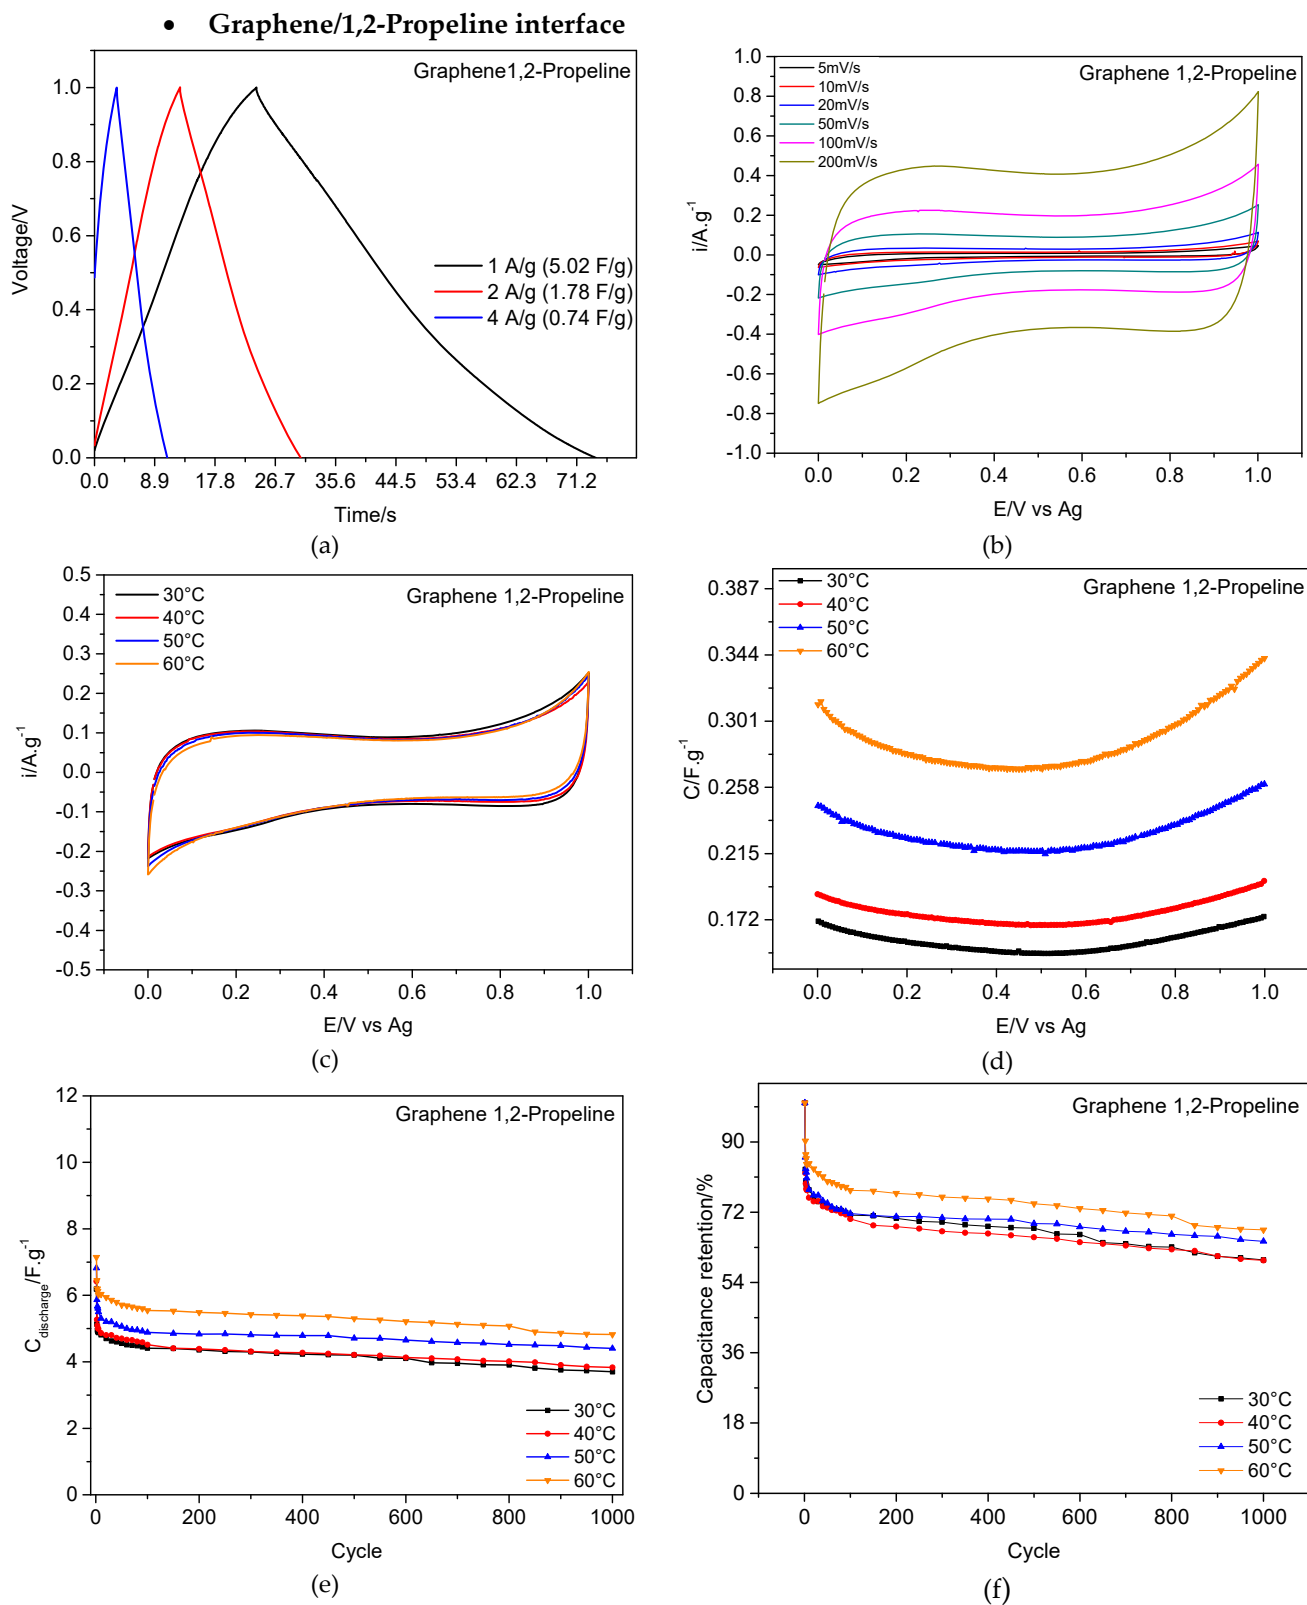

**Figure S3:** Electrochemical testing of graphene in 1,2-propeline electrolyte at 30 °C. a) galvanostatic charge-discharge curves recorded with current density 1, 2 and 4 A.g<sup>-1</sup>. b) CV curves recorded at scan rates 5, 10, 20, 50, 100 and 200 mV. s<sup>-1</sup>, temperature effect at 30, 40, 50 and 60 °C: c) cyclic voltammetry; d) capacitance-potential curve; e) discharge gravimetric capacitance for 1000 cycles; f) capacitance retention.

• Graphite/R200 interface

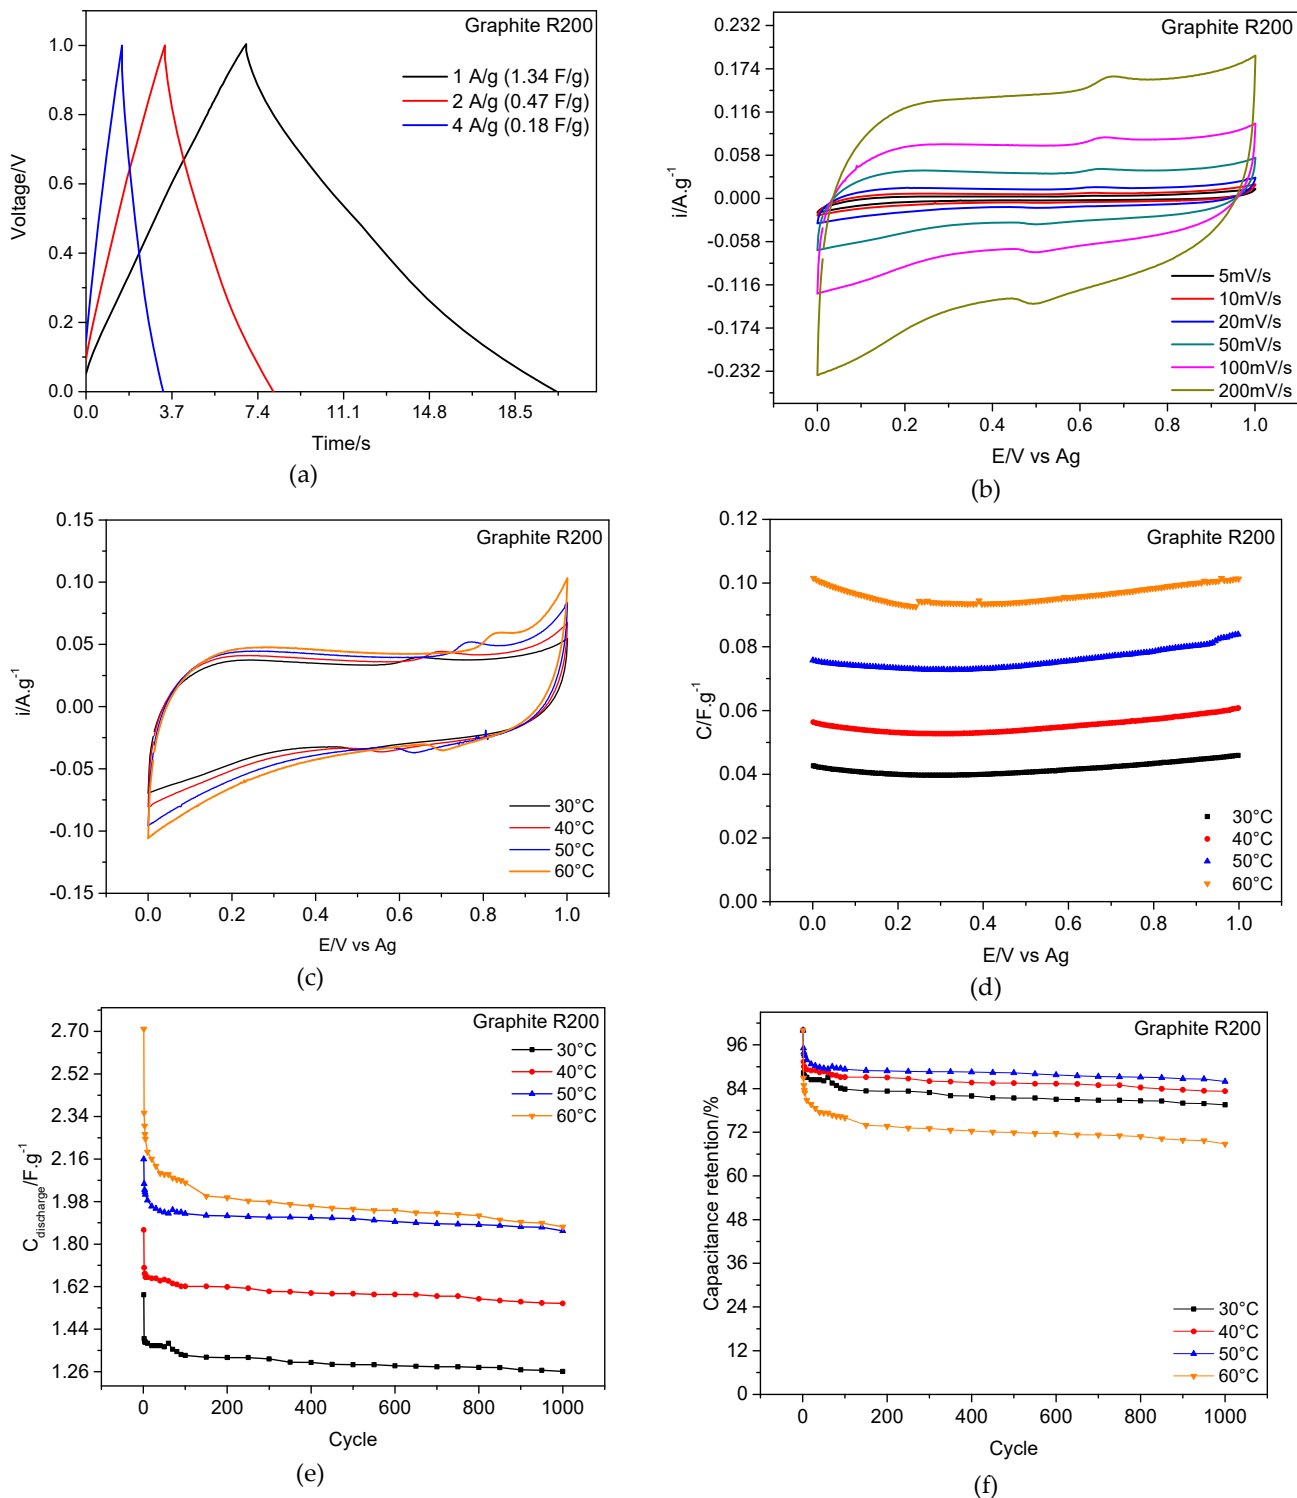

**Figure S4:** Electrochemical testing of graphite in R200 electrolyte at 30 °C. a) galvanostatic charge-discharge curves recorded with current density 1, 2 and 4 A.g<sup>-1</sup>. b) CV curves recorded at scan rates 5, 10, 20, 50, 100 and 200 mV. s<sup>-1</sup>, temperature effect at 30, 40, 50 and 60 °C: c) cyclic voltammetry; d) capacitance-potential curve; e) discharge gravimetric capacitance for 1000 cycles; f) capacitance retention.

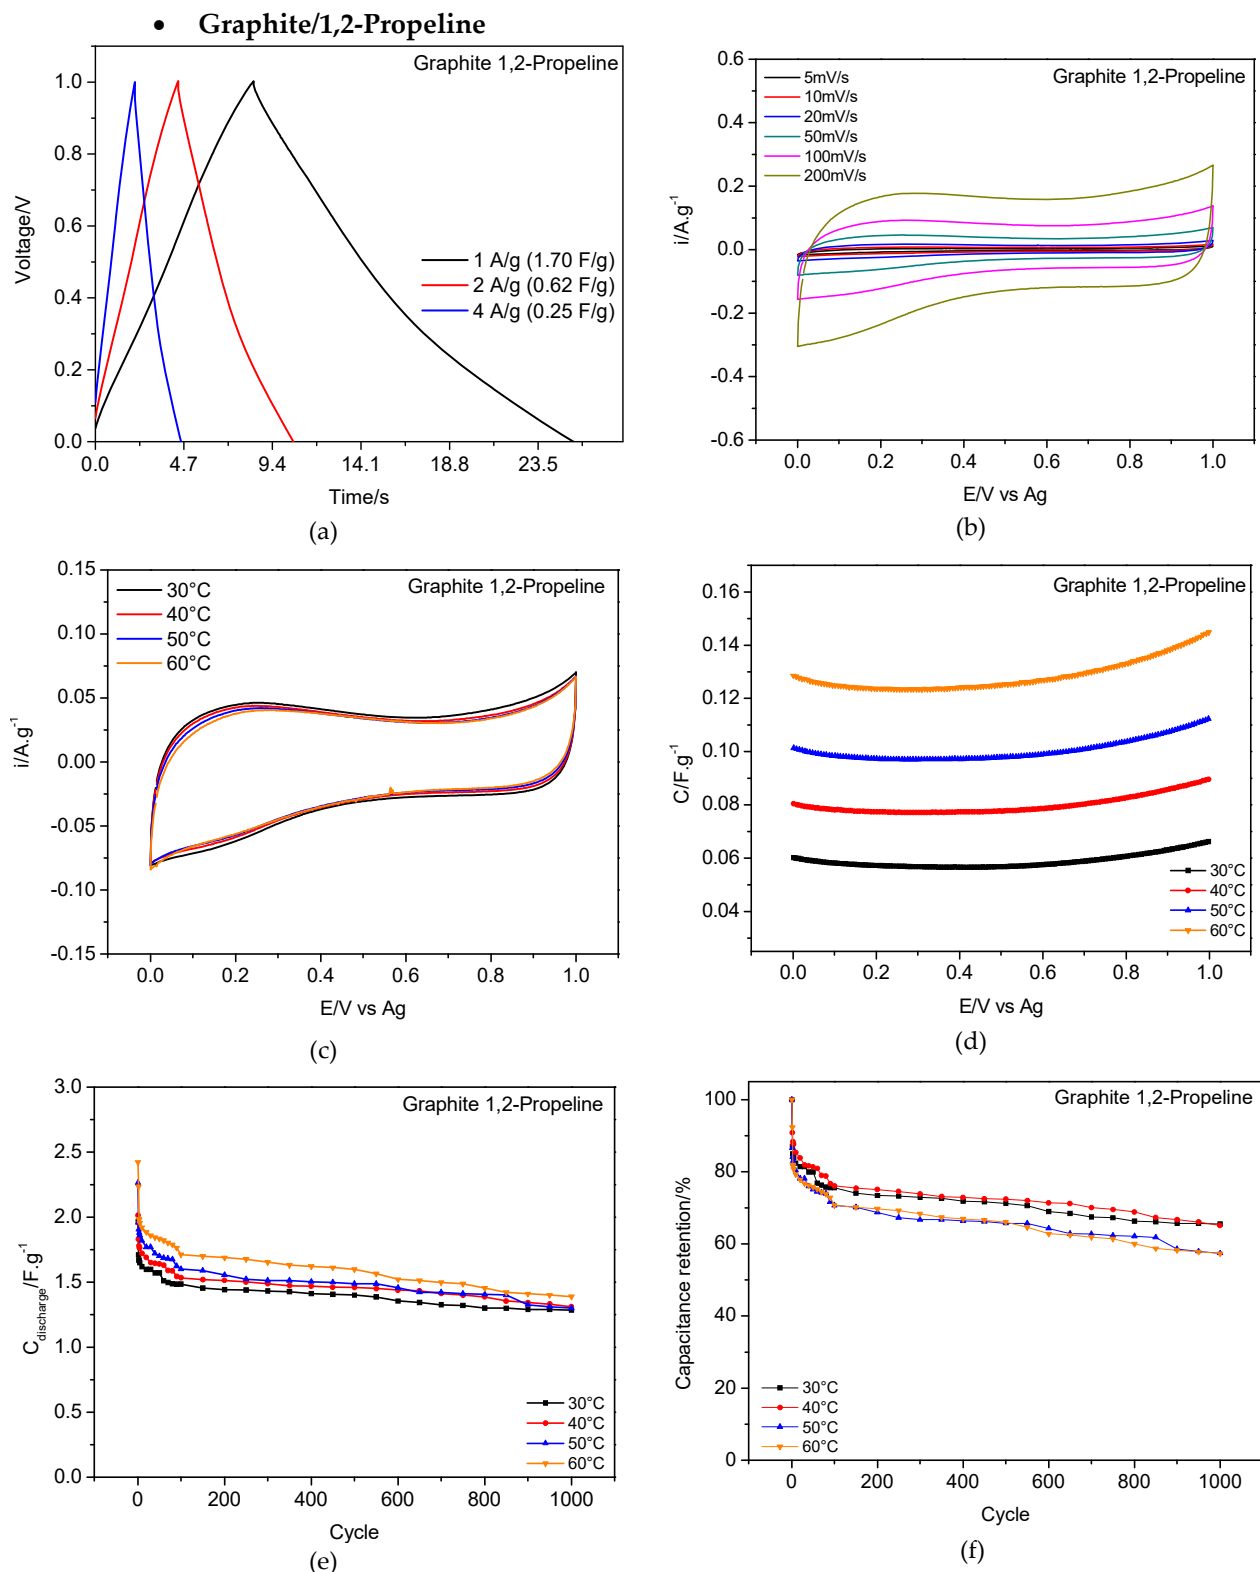

**Figure S5:** Electrochemical testing of graphite in 1,2-propeline electrolyte at 30 °C. a) galvanostatic charge-discharge curves recorded with current density 1, 2 and 4 A.g<sup>-1</sup>. b) CV curves recorded at scan rates 5, 10, 20, 50, 100 and 200 mV.s<sup>-1</sup>, temperature effect at 30, 40, 50 and 60 °C: c) cyclic voltammetry; d) capacitance-potential curve; e) discharge gravimetric capacitance for 1000 cycles; f) capacitance retention.

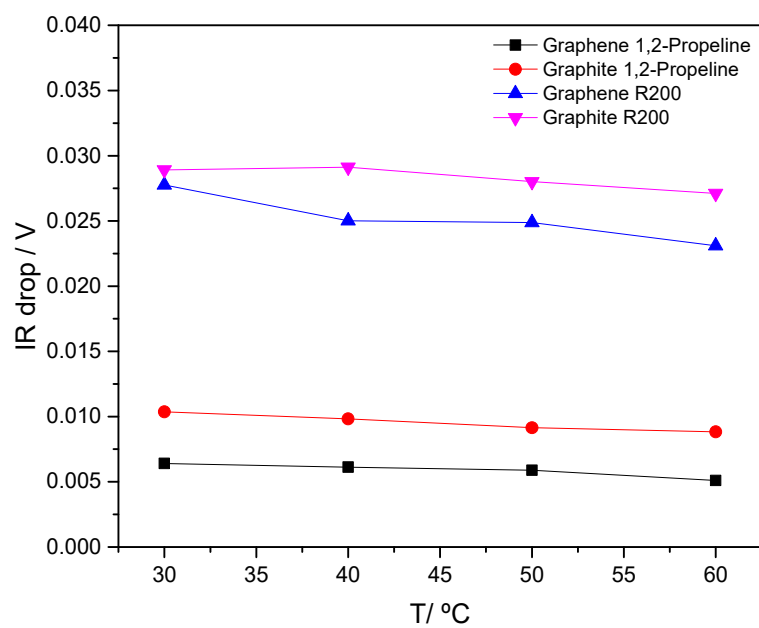

**Figure S6:** IR drop for both carbon materials and eutectic mixtures at temperatures between 30 and 60 °C.

**Table S1:** Temperature effect on capacitance (1<sup>st</sup> cycle) for graphene and graphite in both eutectic mixtures.

|               | <b>G_REF 1,2-P</b> | <b>Graphite 1,2-P</b> | <b>G_REF R200</b> | <b>Graphite R200</b> |
|---------------|--------------------|-----------------------|-------------------|----------------------|
| <b>T / °C</b> | <b>IR drop / V</b> |                       |                   |                      |
| <b>30</b>     | 0.00641            | 0.0104                | 0.028             | 0.0289               |
| <b>40</b>     | 0.00612            | 0.0098                | 0.025             | 0.0291               |
| <b>50</b>     | 0.00589            | 0.0091                | 0.025             | 0.028                |
| <b>60</b>     | 0.0051             | 0.0088                | 0.023             | 0.0271               |

**Table S2:** Temperature effect on capacitance (1000<sup>th</sup> cycle) for graphene and graphite in both eutectic mixtures.

|                             |                 | <b>T/ °C</b>                           |              |              |              |
|-----------------------------|-----------------|----------------------------------------|--------------|--------------|--------------|
| <b>1<sup>st</sup> cycle</b> |                 | <b>30 °C</b>                           | <b>40 °C</b> | <b>50 °C</b> | <b>60 °C</b> |
|                             |                 | <b>Capacitance / F. g<sup>-1</sup></b> |              |              |              |
| <b>1,2-P</b>                | <b>G_REF</b>    | 5.02                                   | 6.43         | 6.82         | 7.16         |
|                             | <b>Graphite</b> | 1.7                                    | 2.02         | 2.27         | 2.42         |
| <b>R200</b>                 | <b>G_REF</b>    | 0.74                                   | 4.22         | 8.1          | 9.01         |
|                             | <b>Graphite</b> | 1.34                                   | 1.86         | 2.16         | 2.71         |

**Table S3:** Temperature effect on IR drop for graphene and graphite in both eutectic mixtures.

|                                 |                 | <b>T/ °C</b>                           |              |              |              |
|---------------------------------|-----------------|----------------------------------------|--------------|--------------|--------------|
| <b>1000<sup>th</sup> cycle*</b> |                 | <b>30 °C</b>                           | <b>40 °C</b> | <b>50 °C</b> | <b>60 °C</b> |
|                                 |                 | <b>Capacitance / F. g<sup>-1</sup></b> |              |              |              |
| <b>1,2-P</b>                    | <b>G_REF</b>    | 4.79                                   | 4.21         | 4.71         | 5.3          |
|                                 | <b>Graphite</b> | 1.29                                   | 1.46         | 1.49         | 1.61         |
| <b>R200</b>                     | <b>G_REF</b>    | 0.69                                   | 3.86         | 4.46         | 6.13         |
|                                 | <b>Graphite</b> | 1.29                                   | 1.59         | 1.91         | 1.95         |
